# Supplementary material for: Facilitators and barriers influencing utilization of services provided by community midwives in district Thatta, Pakistan: a qualitative exploratory study
Source: Springer Nature journal article supplement (doi:10.1186/s12884-022-04823-8), 2022-06-22
Supplement: MOESM2 [file 23195222]

## Interview Guide

### Key informant interview with District Health Officer

|                                                                                                                                                                                                                                                                                   |
|-----------------------------------------------------------------------------------------------------------------------------------------------------------------------------------------------------------------------------------------------------------------------------------|
| <b>CMWs skills competency</b>                                                                                                                                                                                                                                                     |
| <p>1. What services are provided at primary facilities with maternal and newborn services and who provides the care?</p> <p><i>Probes: deliveries, perinatal care, home visits, immunization, growth monitoring provided by CMWs, LHVs</i></p>                                    |
| <p>2. Are midwives involved in the provision of services? And at what level of care?</p> <p><i>Probes: deliveries, perinatal care, home visits, immunization, growth monitoring provided by CMWs, LHVs, levels of care</i></p>                                                    |
| <b>Supportive supervision</b>                                                                                                                                                                                                                                                     |
| <p>3. What are the factors that facilitate midwifery services in the district? Does your office provide any support to midwives to practice in the district?</p> <p><i>Probes: Cultural context, social context, transport, language</i></p>                                      |
| <p>4. In your view what are important barriers to maternal and newborn health services in the district?</p> <p><i>Probes: lack of information, inadequate staffing, sociocultural barriers, cultural context, social context, transport, language</i></p>                         |
| <p>5. What is the process of training and deployment of midwives in the district? Does your office have any role in deploying CMWS after the training is completed?</p> <p><i>Probes: how midwives are trained, who deploy, how many leaders are involved in the process?</i></p> |

6. What support is provided to midwives from government sector?

*Probes: supervision, training, deployment*

### **Key informant interview with Principal, School of midwifery**

#### **CMWs skills competency**

1. What courses are covered in midwifery education?

*Probes: practical and theory work, courses and curriculum*

2. Where and how midwives are trained for clinical practice? Are these opportunities sufficient to start independent practice?

*Probes: supervised deliveries, newborn assessments, antenatal checkups*

3. What is the educational background of midwifery teachers?

*Probes: midwives, nurses, geographical location, practical work*

4. What assessment criterion is followed to provide certification?

*Probes: theory exams, clinical exams, grading criteria*

5. What measures are followed for students who do not successfully pass their exams?

*Probes: re-sit exams, repetition of annual term*

6. Do you have any appreciation reward for high scoring students? If yes, what is it?

*Probes: financial rewards, certificates, material rewards, jobs allotment*

#### **Supportive supervision**

7. What is the admission criteria and process of enrollment for midwifery certification?

*Probes: admissions, qualification, enrollment forms, quota system, admission test*

|                                                                                                                                                                                             |
|---------------------------------------------------------------------------------------------------------------------------------------------------------------------------------------------|
| <p>8. In your opinion, time required for training midwives is appropriate taking in consideration theory and practical knowledge?</p> <p><i>Probes: theory knowledge and practicums</i></p> |
| <p>9. What is the involvement of stakeholders in training of midwives and who do you report?</p> <p><i>Probes: reporting to stakeholders at district level and national level</i></p>       |
| <p>10. What is the fee structure for midwifery certification?</p> <p><i>Probes: fee charged, semesters and term system, annual system</i></p>                                               |

### **Key informant interview with President, Midwifery Association of Pakistan**

|                                                                                                                                                                                                                                                                                    |
|------------------------------------------------------------------------------------------------------------------------------------------------------------------------------------------------------------------------------------------------------------------------------------|
| <p><b>Supportive supervision</b></p>                                                                                                                                                                                                                                               |
| <p>1. What are the major health issues related to maternal and newborn health in Pakistan?</p> <p><i>Probes: maternal and newborn mortality, access to antenatal and delivery services, postpartum complication, complication related to abortions and deliveries</i></p>          |
| <p>2. What is the objective of Midwifery Association of Pakistan?</p> <p><i>Probes: career development, trainings, quality of curriculum</i></p>                                                                                                                                   |
| <p>3. What support Pakistan Nursing Council and Government provide to midwives in trainings, deployment, building linkages with communities, other health care providers, for referrals?</p> <p><i>Probes: financial incentives, trainings, curriculum, career development</i></p> |
| <p>4. In your opinion, what motivates midwives to choose midwifery as their profession?</p> <p><i>Probes: money, interaction with women as their clients, social and cultural preferences</i></p>                                                                                  |
| <p>5. What are the challenges to midwives for delivery of services?</p>                                                                                                                                                                                                            |

*Probes: finance, community support, social and cultural barriers, respect of job, dignity of profession*

**CMWs skills competency**

6. What is the importance of CMWs in provision of maternal and newborn services?

*Probes: maternal and newborn services, easy community access, home visits*

7. Are midwives involved in the provision of maternal and newborn services? And at what level of care?

*Probes: deliveries, perinatal care, home visits, immunization, growth monitoring provided by CMWs, LHVs, levels of care*

8. What is the quality of pre-service training of midwives?

*Probes: hands-on clinical practice, clinical and public health knowledge*

**Key informant interview with Coordinator, Maternal and Neonatal Child Health Program**

**CMWs skills competency**

1. What services are provided at primary facilities with maternal and newborn services and who provides the care?

*Probes: deliveries, perinatal care, home visits, immunization, growth monitoring provided by CMWs, LHVs*

2. Are midwives involved in the provision of services? And at what level of care?

*Probes: deliveries, perinatal care, home visits, immunization, growth monitoring provided by CMWs, LHVs, levels of care*

**Supportive supervision**

3. What are the factors that facilitate midwifery services in the district? Does your office provide any support to midwives to practice?

*Probes: Cultural context, social context, transport, language*

4. In your view what are important barriers to maternal and newborn health services?

*Probes: lack of information, inadequate staffing, sociocultural barriers, cultural context, social context, transport, language*

5. What is the process of training and deployment of midwives? Does your office have any role in deploying CMWS after the training is completed?

*Probes: how midwives are trained, who deploy, how many leaders are involved in the process?*

6. What support is provided to midwives from government sector?

*Probes: supervision, training, deployment*

**Key informant interview with Director, General Nursing and Midwifery**

**Supportive supervision**

9. What are the major health issues related to maternal and newborn health in Pakistan?

*Probes: maternal and newborn mortality, access to antenatal and delivery services, postpartum complication, complication related to abortions and deliveries*

10. What support Pakistan Nursing Council and Government provide to midwives in trainings, deployment, building linkages with communities, other health care providers, for referrals?

|                                                                                                                                                                                                                                                             |
|-------------------------------------------------------------------------------------------------------------------------------------------------------------------------------------------------------------------------------------------------------------|
| <i>Probes: financial incentives, trainings, curriculum, career development</i>                                                                                                                                                                              |
| <p>11. In your opinion, what motivates midwives to choose midwifery as their profession?</p> <p><i>Probes: money, interaction with women as their clients, social and cultural preferences</i></p>                                                          |
| <p>12. What are the challenges to midwives for delivery of services?</p> <p><i>Probes: finance, community support, social and cultural barriers, respect of job, dignity of profession</i></p>                                                              |
| <b>CMWs skills competency</b>                                                                                                                                                                                                                               |
| <p>13. What is the importance of CMWs in provision of maternal and newborn services?</p> <p><i>Probes: maternal and newborn services, easy community access, home visits</i></p>                                                                            |
| <p><b>14.</b> Are midwives involved in the provision of maternal and newborn services? And at what level of care?</p> <p><i>Probes: deliveries, perinatal care, home visits, immunization, growth monitoring provided by CMWs, LHVs, levels of care</i></p> |
| <p>15. What is the quality of pre-service training of midwives?</p> <p><i>Probes: hands-on clinical practice, clinical and public health knowledge</i></p>                                                                                                  |

**In-depth Interviews with midwifery school students**

| <b>Demographic data</b> |     |
|-------------------------|-----|
| 1.                      | Age |

|    |                |  |
|----|----------------|--|
| 2. | Qualification  |  |
| 3. | Marital status |  |

|                                                                                                                                                                                               |
|-----------------------------------------------------------------------------------------------------------------------------------------------------------------------------------------------|
| <b>General questions</b>                                                                                                                                                                      |
| <p>1. Why do you want to become a midwife?</p> <p><i>Probes: self-choice, only option, parental pressure</i></p>                                                                              |
| <p>2. What are your views about significance of midwifery profession?</p> <p><i>Probes: views about scope, earning, respect and dignity</i></p>                                               |
| <p>3. What advice would you give to people considering midwifery as a career?</p> <p><i>Probes: preferences about midwifery as a profession and why?</i></p>                                  |
| <b>CMWs skills competency</b>                                                                                                                                                                 |
| <p>4. How do you find curriculum and training of your program?</p> <p><i>Probes: clinical and practical work, theory knowledge, hands on practice, quality of teachers</i></p>                |
| <p>5. What services can you provide after training?</p> <p><i>Probes: knowledge about services of midwives</i></p>                                                                            |
| <p>6. What opportunities are provided to you to experience midwifery skills?</p> <p><i>Probes: competence to practice skills, confidence to perform deliveries, perinatal assessments</i></p> |
| <p>7. What are your views about course plans and assessment criteria?</p> <p><i>Probes: theory and practical together, assessments related to theory and practical work</i></p>               |
| <p>8. Where will you work after your training is completed?</p> <p><i>Probes: community centers, hospitals, maternity centers</i></p>                                                         |
| <b>Supportive supervision</b>                                                                                                                                                                 |

9. How do you find support to practice clinical skills?

*Probes: support of instructors, support of community, support of in-service midwives*

10. In your opinion what are some reasons that lead midwives to discontinue their profession?

What other jobs they are seeking for?

*Probes: social and cultural barriers, competence, money, community support, stakeholders support*

11. What are facilitating factors for CMWs who have well-established setups in district communities?

*Probes: community trust, competency of skills, stakeholders support, money*

### **In depth Interviews– working group**

| <b>Demographic data</b> |                                 |  |
|-------------------------|---------------------------------|--|
| 1.                      | Age                             |  |
| 2.                      | Type of midwifery qualification |  |
| 3.                      | Highest education level         |  |
| 4.                      | Year of qualification           |  |
| 5.                      | Employment status               |  |
| 6.                      | Years of experience             |  |



|    |                |  |
|----|----------------|--|
| 7. | Marital status |  |
|----|----------------|--|

|                                                                                                                                                                                                                                           |
|-------------------------------------------------------------------------------------------------------------------------------------------------------------------------------------------------------------------------------------------|
| <b>CMWs skills competency</b>                                                                                                                                                                                                             |
| <p>1. What is your current role in the facility?</p> <p><i>Probes: services, teamwork, duties</i></p>                                                                                                                                     |
| <p>2. What is your opinion about your pre-service midwifery training for provision of maternal and newborn services?</p> <p><i>Probes: knowledge about maternal and newborn services, competence of clinical practice</i></p>             |
| <p>3. What services do you provide to community women without supervision?</p> <p><i>Probes: counseling, education, deliveries, antenatal care, detection of high risk cases, newborn assessments, referral services</i></p>              |
| <b>Supportive supervision</b>                                                                                                                                                                                                             |
| <p>4. What support is provided by government to you?</p> <p><i>Probes: supervision, follow-up of the services, finance, setup of clinics</i></p>                                                                                          |
| <p>5. For how long have you been working as CMWs?</p> <p><i>Probes: money, community approach, support from government and private sector, respect</i></p>                                                                                |
| <p>6. What are the challenges you have faced? What were the facilitator factors which helped you in continuing your work as CMW?</p> <p><i>Probes: money, community approach, support from government and private sector, respect</i></p> |
| <p>7. Have you considered leaving your job? If so, why? What factors contributed to your decision to leave the job?</p> <p><i>Probes: security, gender issues, personal issues, social and cultural issues</i></p>                        |

|                                                                                                                                                                                                                           |
|---------------------------------------------------------------------------------------------------------------------------------------------------------------------------------------------------------------------------|
| <p>8. What advice would you give to people considering midwifery as a career?</p> <p><i>Probes: preferences about midwifery as a profession and why?</i></p>                                                              |
| <p>9. What are your views about midwives who are not performing their role for maternal and newborn services?</p> <p><i>Probes: involved in other activities, social, cultural and workplace issues</i></p>               |
| <p>10. What are your opinions about availability and accessibility of midwives for maternal and newborn services in your district?</p> <p><i>Probes: role of midwives, midwives for maternal and newborn services</i></p> |

### **In depth Interviews - Non working group**

|                                                                                                                                                                                                                                |
|--------------------------------------------------------------------------------------------------------------------------------------------------------------------------------------------------------------------------------|
| <p><b>Supportive supervision</b></p>                                                                                                                                                                                           |
| <p>1. What support is provided by government and stakeholders to midwives of your district?</p> <p><i>Probes: supervision, follow-up of the services, finance, setup of clinics</i></p>                                        |
| <p>2. What are the challenges to midwives for delivery of services?</p> <p><i>Probes: finance, community support, social and cultural barriers, respect of job, dignity of profession</i></p>                                  |
| <p>3. What support was provided to you when you were in your job?</p> <p><i>Probes: finance, community support, support by stakeholders</i></p>                                                                                |
| <p><b>CMWs skills competency</b></p>                                                                                                                                                                                           |
| <p>11. What is your opinion about your pre-service midwifery training for provision of maternal and newborn services?</p> <p><i>Probes: knowledge about maternal and newborn services, competence of clinical practice</i></p> |

## IDI with community women

| Demographic data |                             |  |
|------------------|-----------------------------|--|
| 1.               | Age                         |  |
| 2.               | Education                   |  |
| 3.               | Marital status              |  |
| 4.               | Number of children          |  |
| 5.               | Available nearby facilities |  |

| Supportive supervision                                                                                                                                       |
|--------------------------------------------------------------------------------------------------------------------------------------------------------------|
| 1. What are your views about accessibility for midwifery services?<br><i>Probes: transport, time, location</i>                                               |
| CMWs skills competency                                                                                                                                       |
| 2. What are your views about knowledge of midwives for maternal health?<br><i>Probes: knowledge about high risk pregnancies, complications, newborn care</i> |
