# Supplementary material for: Facilitators and barriers influencing utilization of services provided by community midwives in district Thatta, Pakistan: a qualitative exploratory study
Source: Springer Nature journal article supplement (doi:10.1186/s12884-022-04823-8), 2022-06-22
Supplement: MOESM3 [file 23195222]

## THEMATIC MAP

| Condensed meaning units                                                            | Codes                                                                                        | Subthemes | Themes |
|------------------------------------------------------------------------------------|----------------------------------------------------------------------------------------------|-----------|--------|
| Curriculum about maternal and child health                                         | <p><b>Learning opportunities during classroom trainings and practice of their skills</b></p> |           |        |
| Practical learning at hospital                                                     |                                                                                              |           |        |
| Teachers and staff help in learning skills<br>Going civil hospital during training |                                                                                              |           |        |
| Practicum in school and practice in hospital                                       |                                                                                              |           |        |
| Learn from assessments                                                             |                                                                                              |           |        |
| Senior midwives and teachers support in learning                                   |                                                                                              |           |        |
| Learn on dummies                                                                   |                                                                                              |           |        |
| Shifting duties in civil hospital during training                                  |                                                                                              |           |        |
| Skills of delivery, ANC and PNC learnt during training                             |                                                                                              |           |        |
| Maternal and child health courses and knowledge about vaccination                  |                                                                                              |           |        |
| Clinicals in maternity and newborn wards                                           |                                                                                              |           |        |
| Classroom and clinical training                                                    |                                                                                              |           |        |
| Students learning opportunities                                                    |                                                                                              |           |        |
| Time period and process of training                                                |                                                                                              |           |        |

|                                                          |                                                   |                                     |  |
|----------------------------------------------------------|---------------------------------------------------|-------------------------------------|--|
| Learning from clinicals                                  |                                                   | <b>Pre-service training of CMWs</b> |  |
| Practice on dummies                                      |                                                   |                                     |  |
| Learning in skills lab                                   |                                                   |                                     |  |
| Learning on dummies                                      |                                                   |                                     |  |
| Midwives skills development                              |                                                   |                                     |  |
| Learning from clinicals                                  |                                                   |                                     |  |
| Tutors support                                           |                                                   |                                     |  |
| Lack of competency of tutors                             |                                                   |                                     |  |
| Educational background of teachers                       | <b>Educational background of midwifery tutors</b> |                                     |  |
| Educational background of teachers                       |                                                   |                                     |  |
| Midwives taught by doctors and nurses                    |                                                   |                                     |  |
| No background information on midwifery skills            |                                                   |                                     |  |
| No midwife available to teach midwives                   |                                                   |                                     |  |
| Admissions according to union councils                   | <b>Admission procedure of CMWs</b>                |                                     |  |
| Preadmission exam details                                |                                                   |                                     |  |
| Age criteria for admission                               |                                                   |                                     |  |
| Selection of girls from UCs of low education rate        |                                                   |                                     |  |
| Admission done by admission committee                    |                                                   |                                     |  |
| Admission committee consists of 5 to 6 people            |                                                   |                                     |  |
| Admission test for CMWs                                  |                                                   |                                     |  |
| Girls selected from those UCs where no midwife available |                                                   |                                     |  |

|                                                                                     |                                           |  |                                     |
|-------------------------------------------------------------------------------------|-------------------------------------------|--|-------------------------------------|
| Less midwives enrollment from deprived UCs                                          |                                           |  | <b>CMWS SKILLS AND COMPETENCIES</b> |
| No knowledge about referral to students                                             | <b>Deficiencies in midwifery training</b> |  |                                     |
| Learn about maternal and child health during training                               |                                           |  |                                     |
| Skills of IM injection and drug dosage during training in hospital                  |                                           |  |                                     |
| Perform IV and drug dosage during training in hospitals                             |                                           |  |                                     |
| Learn skills of PV exam, IV administration, vital signs in hospital during training |                                           |  |                                     |
| No visits to birthing stations                                                      |                                           |  |                                     |
| Involvement of hospital administration                                              |                                           |  |                                     |
| Lack of competency building training                                                |                                           |  |                                     |
| Non-support of hospital staff in training students                                  |                                           |  |                                     |
| Competency from working in fields                                                   |                                           |  |                                     |
| Competency of services with experience                                              |                                           |  |                                     |
| Sharing her experience of dealing with a complicated case                           |                                           |  |                                     |
| Midwives are competent                                                              |                                           |  |                                     |

|                                                                     |                                                             |                                                           |  |
|---------------------------------------------------------------------|-------------------------------------------------------------|-----------------------------------------------------------|--|
| Competency to conduct deliveries, ANC, PNC with time and experience | <b>Development of skills with working experience</b>        | <b>CMWs skills and competencies for service provision</b> |  |
| Challenge of dealing with high risk patients                        |                                                             |                                                           |  |
| Competent to do deliveries                                          |                                                             |                                                           |  |
| Sharing her experience of IUD                                       |                                                             |                                                           |  |
| Midwives to perform Antenatal checkups to prevent complications     |                                                             |                                                           |  |
| Community prefer midwives because of her behavior                   | <b>Professional skills to gain trust of the communities</b> |                                                           |  |
| Earning based on skills                                             |                                                             |                                                           |  |
| Time and attention of CMWs to gain community trust                  |                                                             |                                                           |  |
| Midwives provide privacy to patients                                |                                                             |                                                           |  |
| Midwives listen to community concerns                               |                                                             |                                                           |  |
| CMWs socially and culturally acceptable care                        |                                                             |                                                           |  |
| CMWs know people of their communities and provide care accordingly  |                                                             |                                                           |  |
| CMWs provides time to clients to listen to their concerns           |                                                             |                                                           |  |
| CMWs are easily approachable                                        |                                                             |                                                           |  |

|                                                            |                                                              |  |  |
|------------------------------------------------------------|--------------------------------------------------------------|--|--|
| CMWs behavior is a facilitator                             |                                                              |  |  |
| CMWs are licensed to open their clinics                    | <b>CMWs can provide independent care without supervision</b> |  |  |
| LHWs work under CMWs because                               |                                                              |  |  |
| CMWs is the only cadre after doctors to open their clinics |                                                              |  |  |
| The purpose of CMWs was to setup birthing stations         |                                                              |  |  |
| They can provide independent care                          |                                                              |  |  |
| Provision of care without supervision                      |                                                              |  |  |
| Can perform ANC, PNC, FP and deliveries independently      |                                                              |  |  |
| Only cadre to provide independent care in communities      |                                                              |  |  |
| Left because of money                                      |                                                              |  |  |
| Delay in stipend                                           |                                                              |  |  |
| Delay in stipend provision                                 |                                                              |  |  |
| No monitoring and supervision by MNCH coordinator          |                                                              |  |  |
| Delay in provision of stipend to midwives                  |                                                              |  |  |
| Increase absenteeism due to delay in stipend               |                                                              |  |  |
| No support in remote areas to perform deliveries           |                                                              |  |  |
| MNCHs program funding problem                              |                                                              |  |  |
| Late payment to CMWs                                       |                                                              |  |  |
| No service structure for CMWs to provide them jobs         |                                                              |  |  |
| Decrease in coordinator and reporting to MNCH department   |                                                              |  |  |

|                                                                             |                                   |                                 |  |
|-----------------------------------------------------------------------------|-----------------------------------|---------------------------------|--|
| Accelerated action plan for performance-only 17 out of 110                  |                                   |                                 |  |
| Late payments to MNCH coordinator                                           |                                   |                                 |  |
| Funding problems of MNCH program of Sindh                                   |                                   |                                 |  |
| No support for establishing birthing stations                               |                                   |                                 |  |
| Problem of government incentive<br>Non provision of equipment by government |                                   |                                 |  |
| Lack of monitoring of schools by PNC and government                         |                                   |                                 |  |
| No monitoring and supervision of students during clinicals                  |                                   |                                 |  |
| No stipend by government                                                    | <b>Lack of Government support</b> | <b>Ownership of CMW program</b> |  |
| NO BS scale for CMWs                                                        |                                   |                                 |  |
| CMWs are not recognized in government national program for health           |                                   |                                 |  |
| CMWs have no professional and educational growth                            |                                   |                                 |  |
| Check and balance and action                                                |                                   |                                 |  |
| Continuation of failure                                                     |                                   |                                 |  |
| Political involvement                                                       |                                   |                                 |  |
| Lack of System structure                                                    |                                   |                                 |  |
| Lack of stakeholders support from department of health                      |                                   |                                 |  |
| No government jobs                                                          |                                   |                                 |  |
| Poverty in villages                                                         |                                   |                                 |  |
| PNC developed curriculum in 1973                                            |                                   |                                 |  |
| PNC only provide support of curriculum and sometime of legal matters        |                                   |                                 |  |
| The time duration had also been changing                                    |                                   |                                 |  |

|                                                 |                                       |                                |  |
|-------------------------------------------------|---------------------------------------|--------------------------------|--|
| The midwifery cadre had been varying over time  | <b>Role of PNC in CMWs regulation</b> | <b>No CMWs regulatory body</b> |  |
| CMWs are registered with PNC to provide care    |                                       |                                |  |
| PNC accredited midwifery schools                |                                       |                                |  |
| PNC provide midwifery curriculum and take exams |                                       |                                |  |
| PNC provides licensing to midwives              |                                       |                                |  |
| No separate regulatory body for CMWs            | <b>Lack of dominant role for CMWs</b> |                                |  |
| No monitoring and supervision of CMWs           |                                       |                                |  |
| Only provides curriculum                        |                                       |                                |  |
| No extra classes for CMWs                       |                                       |                                |  |
| No refresher trainings by PNC                   |                                       |                                |  |
| PNC doesn't approach working midwives           |                                       |                                |  |
| PNC looks after all nurses and midwives         |                                       |                                |  |
| No domain for midwives                          |                                       |                                |  |
| No separate department for CMWs                 |                                       |                                |  |
